# Supplementary material for: Unravelling the long-term, locally-heterogenous response of Greenland glaciers observed in archival photography
Source: Copernicus journal article supplement (doi:10.5194/tc-2021-256), 2021-09-22
Supplement: Supplementary file 1 [file tc-2021-256-supplement.pdf]

# Supplementary material to: Unravelling the long-term, locally-heterogenous response of Greenland glaciers observed in archival photography

Michael Cooper<sup>1</sup>, Paulina Lewińska<sup>2</sup>, William A. P. Smith<sup>2</sup>, Edwin R. Hancock<sup>2</sup>, Julian A. Dowdeswell<sup>3</sup>, and David M. Rippin<sup>1</sup>

<sup>1</sup>Department of Environment and Geography, University of York, York, UK

<sup>2</sup>Department of Computer Science, University of York, York, UK

<sup>3</sup>Scott Polar Research Institute, University of Cambridge, Cambridge, UK

**Correspondence:** David Rippin (david.rippin@york.ac.uk)

In Table 1 we provide a additional detail on our derived orthophotomap model. Specifically, we provide a detailed summary of the individual structure-from-motion models and the resulting orthophotomaps. For each model we show (left to right):

1. The approximate model location within the overall map area
2. The mission within which the source images were acquired, the type of images acquired and surface area covered by the model
3. The number of ground control points used in total for each model and the average number of ground control points placed on each image
4. The number of images used to build the model and the spatial density of ground control points (in terms of number of GCPs per unit area)
5. The GCP errors in terms of: average 2D error, average 3D error and maximum 3D error, all in metres
6. The average absolute GCP errors in the X, Y and Z directions in metres
7. The minimum and maximum signed GCP errors in the X, Y and Z directions in metres

The density of GCPs was adapted depending upon the availability of identifiable features in the reconstructed model and reference DEM. In addition, extra GCPs were added where the errors suggested alignment between reference and reconstructed models was poor.

| Area                                                                                | Mission /<br>Type of<br>images /<br>Area [km <sup>2</sup> ] | Number GCP/<br>Average<br>number of<br>GCP per image | Number of<br>images /<br>Number of<br>GCP per km <sup>2</sup> | 2D error /<br>3D error /<br>Max 3D<br>error [m] | X/Y/Z<br>average<br>errors<br>[m] | Min/Max value<br>of X/Y/Z error<br>[m]                    |
|-------------------------------------------------------------------------------------|-------------------------------------------------------------|------------------------------------------------------|---------------------------------------------------------------|-------------------------------------------------|-----------------------------------|-----------------------------------------------------------|
| 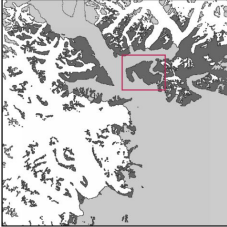   | BAARE /<br>aerial oblique<br>/ 376                          | 22 / 10                                              | 13 / 0.03                                                     | 22.25 /<br>24.68 /<br>36.51                     | 18.70 /<br>12.06 /<br>10.68       | (25.92, -35.90) /<br>(34.30, -20.25) /<br>(16.91, -22.21) |
|    | BAARE /<br>aerial oblique<br>/ 558                          | 17 / 15                                              | 20 / 0.04                                                     | 15.50 /<br>19.52 /<br>36.51                     | 11.78 /<br>10.07 /<br>11.86       | (22.23, -18.42) /<br>(15.33, -18.42) /<br>(23.46, -16.02) |
|    | BAARE /<br>aerial oblique<br>/ 77                           | 11 / 12                                              | 12 / 0.16                                                     | 22.53 /<br>26.41 /<br>37.94                     | 18.42 /<br>12.98 /<br>13.77       | (28.65, -31.94) /<br>(18.93, -19.63) /<br>(22.26, -22.76) |
|  | BAARE /<br>aerial oblique<br>/ 154                          | 15 / 14                                              | 6 / 0.04                                                      | 16.16 /<br>20.85 /<br>35.97                     | 13.83 /<br>8.36 /<br>13.17        | (22.02, -24.15) /<br>(13.99, -12.99) /<br>(33.13, -21.72) |
|  | BAARE /<br>aerial oblique<br>/ 238                          | 13 / 8                                               | 35 / 0.15                                                     | 12.40 /<br>13.25 /<br>23.27                     | 10.63 /<br>6.39 /<br>6.39         | (15.48, -22.35) /<br>(9.16, -11.27) /<br>(7.79, -7.70)    |

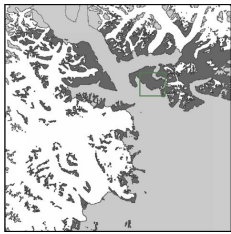

CORONA / 45 / 45 2 / 0.25 19.92 / 15.70 / (32.94, -34.41) /  
satellites 21.04 / 12.26 / (30.41, -26.86) /  
stereo pair / 35.66 6.76 (13.50, -15.78)  
181

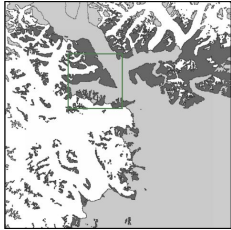

CORONA / 75 / 75 2 / 0.37 17.87 / 13.21 / (25.41, -29.96) /  
satellites 18.76 / 12.03 / (26.19, -24.62) /  
stereo pair / 32.21 5.72 (14.98, -15.37)  
202

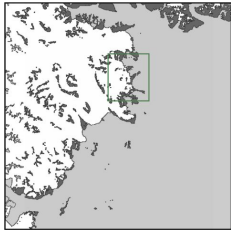

CORONA / 73 / 73 2 / 0.53 17.45 / 13.10 / (28.40, -30.69) /  
satellites 17.94 / 11.52 / (27.83, -24.33) /  
stereo pair / 31.72 4.19 (10.84, -19.82)  
138

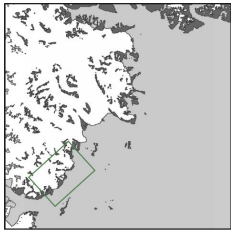

CORONA / 64 / 64 2 / 0.76 15.83 / 11.35 / (27.28, -23.69) /  
satellites 16.47 / 11.04 / (26.86, -19.20) /  
stereo pair / 27.55 4.53 (14.79, -12.94)  
84

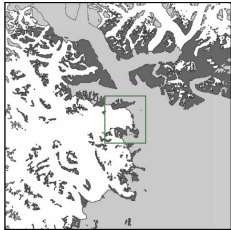

CORONA / 128 / 128 2 / 0.54 19.98 / 13.83 / (32.44, -34.16) /  
satellites 23.22 / 14.421 / (31.66, -38.49) /  
stereo pair / 41.17 11.83 (34.37, -27.14)  
238

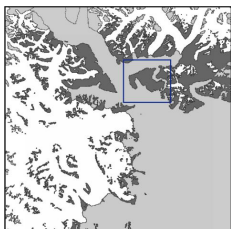

---

14.08.1981 / 64 / 25 5 / 0.20 17.65 / 13.68 / (24.90, -25.65) /  
aerial vertical 19.05 / 11.15 / (23.11, -21.66) /  
/ 316 28.81 7.16 (16.36, -18.79)

|                                                                                   |                                           |         |           |                             |                             |                                                           |
|-----------------------------------------------------------------------------------|-------------------------------------------|---------|-----------|-----------------------------|-----------------------------|-----------------------------------------------------------|
| 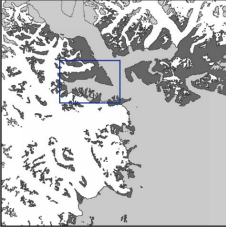  | 14.08.1981 /<br>aerial vertical<br>/ 238  | 19 / 12 | 6 / 0.08  | 24.35 /<br>32.79 /<br>45.56 | 19.58 /<br>14.48 /<br>21.96 | (38.61, -38.30) /<br>(28.83, -36.87) /<br>(38.52, -38.05) |
|  | 14.08.1981 /<br>aerial vertical<br>/ 2898 | 66 / 25 | 6 / 0.02  | 23.32 /<br>27.26 /<br>44.57 | 16.32 /<br>16.67 /<br>14.09 | (39.97, -31.46) /<br>(29.62, -33.38) /<br>(28.94, -40.88) |
|  | 30.07.1981 /<br>aerial vertical<br>/ 1144 | 19 / 11 | 13 / 0.02 | 20.66 /<br>23.20 /<br>31.77 | 11.63 /<br>17.08 /<br>10.55 | (21.28, -19.74) /<br>(26.64, -23.50) /<br>(17.22, -20.21) |

Table 1: Archival Orthophotomaps: for each model we summarise the input data (mission, number of images, type of images, area covered), ground control point placement and residual errors in the GCPs after alignment. See text for detailed description of each column.
