# Supplementary material for: Unravelling the long-term, locally-heterogenous response of Greenland glaciers observed in archival photography
Source: Copernicus journal article supplement (doi:10.5194/tc-2021-256), 2021-09-22
Supplement: Supplementary file [file tc-2021-256-AC1-supplement.pdf]

Dear Editor

Many thanks for overseeing the review of our paper: *'Unravelling the long-term, locally-heterogenous response of Greenland glaciers observed in archival photography'*. We are very pleased to see the positive comments made by both reviewers on our work. We appreciate the recognition of just how much work has gone into the processing of this imagery, and our focus on lesser-studied glaciers. We were particularly pleased to read that Reviewer 2 considered our work to be 'an important scientific contribution' and that our 'results deserve to be published', while Reviewer 1 considers that (with some changes) our paper 'can provide an impactful contribution'. We are also appreciative of the thorough reading of our work by both reviewers, and as a result, they have raised a number of issues and concerns which we now deal with one by one. Each relevant statement from the reviewers is indicated by red text, whereas our responses are in black text. Here we provide responses to Reviewer 1 only. We respond to Reviewer 2 in a separate document.

## Reviewer 1

### *Comment in paragraph 3*

The discussion needs improvement in order to better support the point that "full understanding of the behaviour and response of the Ice Sheet requires us to consider changes that are taking place at the scale of individual glaciers" (abstract). The paper does an excellent job of showing the heterogeneity among glaciers in the data, but the discussion is weak on interpreting this heterogeneity. I understand that, without observations at most of these glaciers (e.g., bathymetry, oceanographic data), it is not possible to draw conclusions about why some glaciers are stable while others retreat. This paper hypothesises that bathymetry and subglacial topography is likely what is stabilising some glaciers, but this has been shown in previous work (e.g., Catania et al., 2018). The discussion in the paper needs to be strengthened by showing what can be learned from focusing on the lesser-studied glaciers and by extending the record of glacier behavior back in time, beyond what has already been shown in past literature. In other words, the discussion can be improved by focusing on the novel aspects of the archival data. For example, one question that the authors can consider addressing is: if air and sea-surface temperatures exhibit similar anomalies from the long-term baseline in the 1930s and 1940s as they do in the 2000s and 2010s (Figs. 7 and 8), why do marine-terminating and GrlS outlets respond with so much more retreat in the latter period (Fig. 2)? This is a novel question that could be addressed with the archival data of southeast Greenland that could not have been addressed before.

Thank you for this comment and the suggestions. We have acted on all of the suggestions in the subsequent 'editorial comments' which, together, we feel has strengthened our discussions. As mentioned below, we have also toned down some of our interpretation so that it is slightly more speculative, because we lack the data necessary to draw firm conclusions. For example, a lack of subglacial topography and bathymetry data for large regions. Finally, we have tried to express more clearly the importance of our work and the insights it offers. The reviewer is correct that Catania et al. (2018) have already shown the role of bed topography and bathymetry in modulating flow velocities, and we have made this clear. We would like to highlight that the fact we see such behaviour in our data too is gratifying. We believe, however, that our insights are unique and make an important

contribution because firstly we are working in Eastern Greenland (in a previously unstudied area) and we are exploring unstudied and overlooked smaller glaciers. Secondly, we demonstrate the ability of archival imagery to extend the record over which we are able to draw such conclusions - in fact, we triple the duration of such a study, which we believe to be an important step. In answer to the question the reviewer poses, we believe that the increase in retreat in the latter period, despite air and SST temperatures being similar to the earlier period, is a demonstration of just how important bed topography is - i.e. it has the ability to reveal very different retreat behaviour, through modulation of the role of air and sea surface temperatures.

### *General comment 1*

One of the conclusions of the study is that it is important to study glacier-to-glacier heterogeneity in order to get a full understanding of the behavior and response of the ice sheet. While I agree with this sentiment, I feel that this paper frames past work incorrectly. For example, lines 478-480 state that “there has been a temptation in the past to differentiate between regions.” I disagree that past work that focused on regional aggregations of glacier behavior did so simply because it was tempting to do this. The goal of grouping regionally is to understand whether there are broad patterns to glacier behavior and their response to external forcing. And, while there have been previous studies that have grouped glaciers regionally, there are also studies that have shown significant heterogeneity between neighboring glaciers (e.g., Bjørk et al., 2012; Carr et al., 2017). I have two suggestions: a. Change the wording throughout the manuscript to more accurately state that the goals of the past regional studies was to investigate broad-scale patterns, while this present study focuses on glacier-to-glacier heterogeneity. OR b. Add to the introduction an overview of past studies that have looked at glacier-to-glacier heterogeneity, explain what they had found, and then go on to describe how this present study builds on that previous work.

Many thanks for this insightful and well-explained concern. The reviewer makes an excellent point, and highlights the fact that it was not clear that we are interested here in glacier-to-glacier heterogeneity. We definitely did not mean to imply that regional aggregation of glaciers was done just because it was tempting to do so (i.e. without any other scientific reason). However, we recognise that this is not clear from our work. As a result, we have modified the manuscript to follow the first of the two alternative suggestions made - i.e. to make it clear that the goals of past regional studies was to investigate broad-scale patterns, while our work focuses on glacier-to-glacier heterogeneity. As a consequence, we make several modifications:

- At the end of paragraph 1 in our ‘Study area’ section, we state: ‘Dividing the ice sheet into discrete regions like this has proved to be a powerful approach for exploring broad-scale patterns.’
- We also modify a key statement in the final paragraph of the conclusions so that it now reads: ‘In the past, regional investigations across the Greenland Ice Sheet have been key (e.g. Mouginot et al., 2019, King et al., 2020). This has been important for exploring broad scale regional behaviour and responses. However, our work here, in which we have focused on glacier-to-glacier heterogeneity, shows that within regions there is great complexity, with even adjacent glaciers behaving very differently.’

### *General comment 2*

An estimate of observation errors for SST and SMB should be added to the manuscript. Currently, Figures 7, 8, and 9 show the standard deviation of the data around the mean (gray shading) but this does not take into account errors in each individual measurement. I appreciate that it is difficult to assess the errors on these data but, at the very least, a rough estimate should be incorporated such that the gray shading includes both the scatter in the measurements and the errors on the measurements themselves.

We appreciate the request and agree that the SMB and SST datasets we used are not described in detail. However, due to the way that these datasets were produced, it's not clear that a meaningful "observation error" can be provided. The two datasets were created by other scholars that we cite (see below). Their lengthy papers give many details about the raw temperature datasets used, sources and magnitudes of error and their mitigation. To summarise those papers: SMB modelling is based on various datasets covering the time period; temperature datasets span from classical, analogue methodological stations to automated to various satellite based measurement techniques. During modelling, those data sets are combined and, where possible, they are cross validated. They can be, and are often, used for validation of steps of modelling. Due to this, it is not the raw data that is used for final models but data adjusted in the way that it would remove obvious errors at least in overlapping data sets. If the reason for systematic error occurrence is known (for example for satellite data - sunspot activity periods) the whole data set, not only the overlapping part, can be adjusted. This is why it would be hard to estimate individual observation errors. The original data sets might have their errors, for example, derived from device sensitivity, but after cross validation and removing of various systematic errors, this information is no longer valid for a combined data set. Due to all this, various other statistical methods are being used for error analysis like RMSE as it is described in detail in Box et al. (2009) and Rayner et al. (2003). A good example is Box and Colgan (2013) when, in order to analyse their 1840-2010 SMB results, they used the Monte Carlo method to analyse the marine ice loss parameter used. They found that before 1991 (a point in time when a new mass balance data set was introduced) their uncertainty increases linearly and, after 1991, it is constant. Keeping in mind that we have included a level of variation (standard deviation) in our plots in order to incorporate any lag or variability in time (and space), it is envisaged that any error in 'observation' would be relatively insignificant. We will add explanations along these lines to the revised version of the paper.

- Rayner, N. A., Parker, D. E., Horton, E. B., Folland, C. K., Alexander, L. V., Rowell, D. P., Kent, E. C., and Kaplan, A.: Global analyses of sea surface temperature, sea ice, and night marine air temperature since the late nineteenth century, *Journal of Geophysical Research: Atmospheres*, 108, <https://doi.org/10.1029/2002JD002670>, 2003
- Box, J., Yang, L., Bromwich, D., and Bai, L.-S.: Greenland Ice Sheet Surface Air Temperature Variability: 1840–2007, *Journal of Climate* J CLIMATE, 22, 4029–4049, <https://doi.org/10.1175/2009JCLI2816.1>, 2009
- Box, J. E. and Colgan, W.: Greenland Ice Sheet Mass Balance Reconstruction. Part III: Marine Ice Loss and Total Mass Balance (1840–2010), *Journal of Climate*, 26, 6990 – 7002, <https://doi.org/10.1175/JCLI-D-12-00546.1>, 2013.
- Wake, L., Huybrechts, P., Box, J., Hanna, E., Janssens, I., and Milne, G.: Surface mass-balance changes of the Greenland ice sheet since 1866, *Annals of Glaciology*, 50, 178–184, <https://doi.org/10.3189/172756409787769636>, 2009.

- Hanna, E., Cappelen, J., Fettweis, X., Mernild, S. H., Mote, T. L., Mottram, R., Steffen, K., Ballinger, T. J., and Hall, R. J.: Greenland surface air temperature changes from 1981 to 2019 and implications for ice-sheet melt and mass-balance change, *International Journal of Climatology*, 41, E1336–E1352, <https://doi.org/https://doi.org/10.1002/joc.6771>, 2021.

*General comment 3*

I suggest combining Figures 7, 8, and 9 into one. This would make it easier to compare air temp, SST and SMB.

This is a good suggestion. We have created a mock up of the combined figure as suggested, a copy of which can be seen below. It now makes it much easier to compare how all these variables change, and to spot similarities in behaviour. Note that the final version will be modified such that the x axis is the same for all three plots. One consequence of doing this however is that the combined figure caption would be extremely long and would no longer fit on one page along with the new figure. We therefore propose to reduce the text in the new combined caption and add a more detailed description of the figure in the text. We hope this is acceptable.

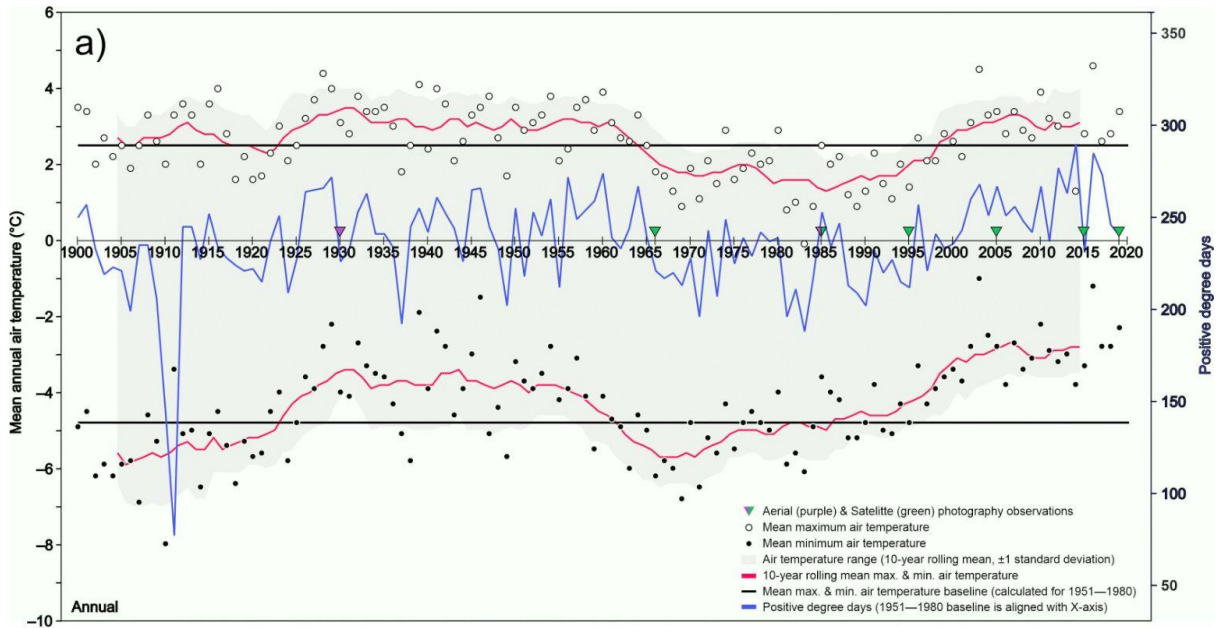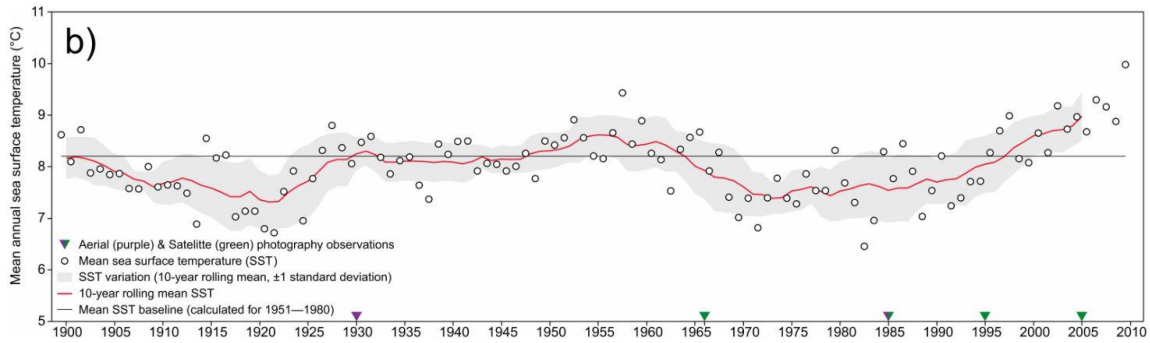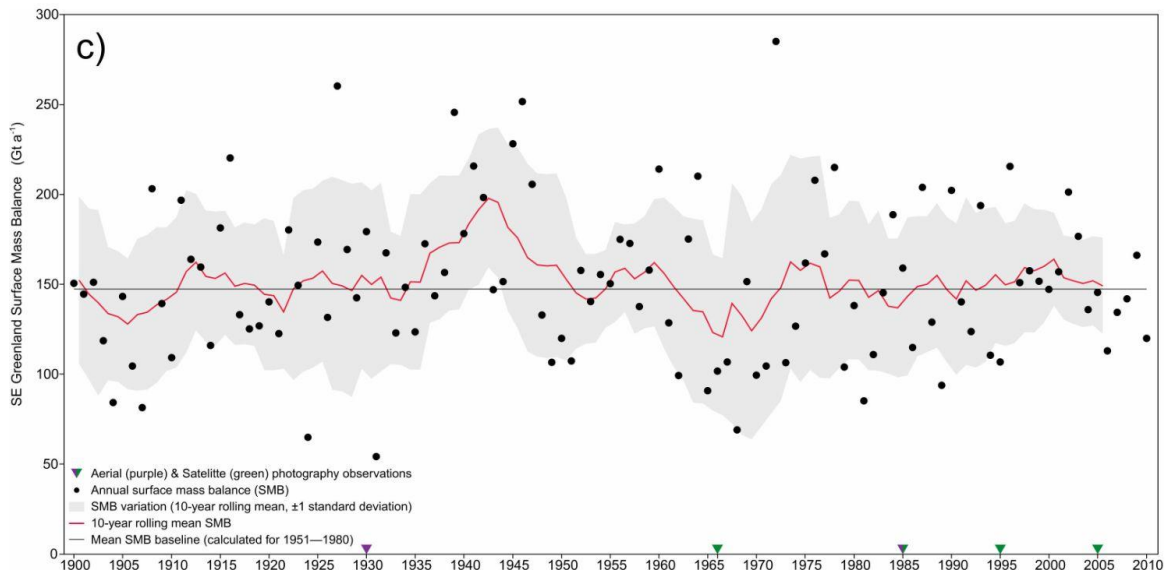

**General comment 4**

Some of the text in the discussion section presents results without any interpretation and the manuscript would be clearer if this text were moved to the results section. I've tried to note this in my editorial comments below but I may have missed some. I suggest the authors go

through the manuscript to move any text that does not include interpretation from the discussion section to the results section.

Thank you for raising this point. We have gone through our paper to ensure that we do not do this unnecessarily. There is one exception where we believe there is some merit in retaining some of this description in the discussions. We discuss this in respect of the reviewer's editorial comment relating to lines 430-438 in the original manuscript (below).

*General comment 5*

In general, more explanation is needed throughout the discussion to substantiate some of the interpretation. I've noted this in editorial comments below.

By responding to all of the editorial comments below, we hope that we have now provided sufficient support for our interpretation. We have also tried to tone down some of our thinking, and make it clear that we are being somewhat speculative in our interpretation. We believe it is worth making these speculations though, as they perhaps pave the way for future important work in Greenland.

*General comment 6*

The interpretation of the behavior of Glacier 14 needs to be clarified. First, the text on lines 442-446 states that the bathymetry data in front of Glacier 14 shows that the stable portion of the terminus is located where the bed is deeper. Although the bed may be deeper in front of the terminus, the data doesn't show what the topography is just upstream of the terminus. There could potentially be a steep ridge there and the bathymetry data that's available does show a shallowing towards the terminus. Second, the text on lines 446-449 goes on state that the observed stability is in opposition to the fact that calving rates tend to be higher for termini in deeper water. This is slightly confusing because terminus stability arises from stable calving and melt rates. In other words, the calving rate can be high but as long as it doesn't increase (and melt rates don't increase), the terminus will not retreat (velocity also has to remain steady). So, it isn't the calving rate itself but changes in the calving rate that are important. Finally, this paragraph hypothesizes that the western part of this glacier is "subject to dynamically-driven mass loss" even though the terminus position is stable. This interpretation is not supported and I would like to see more explanation for why the authors think this is the case. The evidence presented is that the western portion has faster ice flow and is grounded in deeper water (although I question this) but I don't see why this leads to the claim that this glacier is dynamically losing mass.

Thank you for these insights. We have now added some text to suggest that there may well be a shallowing in the bathymetry and thus a ridge which pins the westernmost outlet of Glacier 14. We hypothesise that this ridge could be pinning the glacier and thus be the explanation for apparent relative stability here. However, we do still suggest that an alternative explanation is that large amounts of mass loss are still occurring, but these are countered thanks to faster ice flow. We have also toned down our apparent confidence in our interpretation so as to be a little more speculative.

### *General comment 7*

Similar to my previous point, the text on line 455 states that Glacier 15 is undergoing "surface thinning" and is "losing the greatest amount of mass" however this is not supported. Please add justification for these claims.

Following on from the changes made and outlined above, we have removed this statement about losing the greatest amount of mass and surface thinning. Instead we comment on the fact that ice velocities are high and frontal retreat is also high. Following the thinking used in the consideration of Glacier 14, these two things together suggest that this outlet is most likely to be losing most mass.

### *General comment 8*

The data availability statement does not comply with the requirements of the journal. The journal data policy states that if the data is not made publicly accessible in a FAIR repository, an explanation needs to be provided for why this is the case ([https://www.thecryosphere.net/policies/data\\_policy.html](https://www.thecryosphere.net/policies/data_policy.html)). My strong recommendation is for the orthophotos from the BAARE and CORONA, as well as the derived terminus positions from all of the imagery (including those from Landsat), be placed in a FAIR repository, with a DOI obtained and referenced in the Data Availability section.

We will update the data availability statement such that it is compliant. For clarity, the source datasets are all available under their own terms. Specifically, the Corona data set has its own DOI: Declassified Satellite Imagery - 1 Digital Object Identifier (DOI) number: /10.5066/F78P5XZM and can be obtained from USGS (United States Geological Survey) via EarthExplorer - some of the images are available for free some are available at the cost of 30 US Dollars. The BAARE expedition dataset has been given to the Scott Polar Institute mostly by descendants of the original members of expeditions or other institutions that held the images and developed/undeveloped glass plates. As such they are under the protection of the Institute and can be used for scientific reasons once an agreement has been reached. To the maximum extent permissible by the terms of our access to the original source datasets, we will make the processed orthophotomaps publicly available in a FAIR repository with DOI. We will also include the data set of shape files of frontal positions between 1985-2019. All data will or is already available at PANGAEA database.

### **Editorial Comments**

[line 279] Change "Thss" to "This"

Correction made as suggested.

[lines 308-309] The sentence "Those outlets ... greater variability" repeats what has already been said earlier in the paragraph about marine-terminating glaciers. I suggest removing this sentence.

We do as suggested and remove the sentence. Removing the text that mentions ocean currents, bathymetry etc also makes sense as this is more interpretative and thus not appropriate in the results section.

[lines 309-310] I suggest moving this sentence to the discussion because it does not directly describe results.

We agree (see response to previous comment). We have moved this to the discussions. However, we had some similar text already relating to this statement, but have expanded this slightly. Consequently, at the end of the penultimate paragraph of section 4.1, we now say: 'Such behaviour is well-documented (Moon and Joughin, 2008; Murray et al., 2015), and highlights that the oceans (currents, tides and bathymetry) and SST changes have a vital role in the stability of these ice masses'

[lines 311-312] These sentences should be moved to the paragraph where Figures 2 and 3 are described.

While we understand the rationale for this suggestion, we believe there is a good reason to retain its current position. The sentences prior to this contain considerations of change and variability in our different types of study glacier. However, we also observe that some glaciers show marked stability and we feel that this is an apt way to conclude this section. On this basis, if the reviewer and editor approve, we propose to leave this sentence where it is.

[line 329] I suggest renaming this section to "Surface mass balance"

Correction made as suggested.

[line 365] I suggest changing "controllers" to "external forcings"

Correction made as suggested.

[lines 365-371] This paragraph should be moved to the discussion. It can be combined with the existing text in Section 4.1.

Again, we understand the rationale that this paragraph appears at first sight to be more appropriate in the discussion section, we believe that there is a strong rationale for keeping its current position. This section (3.5) is a rigorous summary of how the various datasets have varied over time, and an attempt to identify co-variability or differences. We feel that such summarising is important to help draw out important relationships before launching into the discussions where we try to understand the mechanism and controls on these variables. Identifying lags (as we do in lines 365-371) is an important part of this, and we feel it would



be out of place to have to draw this out within the discussions rather than here in the results (and indeed in a subsection dedicated to summarising all the data).

[lines 380-382] Please add the start and end years that define each of these periods discussed in this sentence

Suggestion made as suggested. In the first paragraph of the discussions, we have modified the text to read: 'Greater rates of retreat take place during the warmer period (approximately 1925-1964), with a more subtle slowing of this response during the cooler periods (approximately 1905-1925 and 1964-1996), and a faster retreat/collapse in the contemporary period (approximately 1996 onwards) (Hanna et al., 2012; Van den Broeke et al., 2016).'

[lines 383-384] Please add some discussion of this differences in air temperature from this study and what was shown by Hanna et al. (2021). Is this just the difference between Greenland-wide air temperature versus the trend in the southeast? Or is there a difference between the air temperature reconstructions for the same region?

There is some complexity here. Firstly, we acknowledge that our statement of increasing temperatures in the contemporary period was perhaps a little simplistic, as there is a slight flattening in recent years, which we now state very briefly in point (iv) of section 3.5. Beyond that, we believe that the interpretation of Hanna et al. (2021) is perhaps more rigorous than our own in the contemporary period. Hanna et al. (2021) state that there are compensating warming and cooling periods that together mean no significant net temperature change (we are not clear from the work of Hanna et al. (2021) whether this lack of change is from 2001 or just from 2012 - this is not clear in their work). We therefore modify our text to reduce the significance of the apparent conflict between Hanna et al. (2021) and us. We now replace:

*Interestingly, our direct observation of increasing air temperatures in the contemporary period somewhat contradicts the recent work of Hanna et al. (2021) who suggest that Greenlandic air temperature trends are generally flat since 2001. Figure 7 suggests a small but important rising temperature trend in this part of Greenland. This is particularly so in the record of minimum air temperature, which may be significant when considering the role of elevated minimum temperatures on the net amount of melt that takes place.*

with:

*Hanna et al. (2021) suggest that Greenlandic air temperature trends are generally flat since 2001. Taking this period in isolation, although there is some clear variability, it is possible that the overall trend is flat or at least subdued. However, taken as a whole, we believe that temperature trends in the contemporary period do show an overall increasing trend. This is particularly so in the record of minimum air temperature, which may be significant when considering the role of elevated minimum temperatures on the net amount of melt that takes place.*

[line 385] Please explain why this increase is seen as important. Was there a threshold crossed? Is it the largest observed increase in XX years? I also suggest mentioning the positive degree days in the contemporary period and discuss their behavior.

Given we have now modified this section, we no longer state that the increase is important and so do not respond further to this point. We do, however, add a small amount of material about the positive degree days. We move the passage

*'In the contemporary period, we also see warmer seas, as well as a larger increase in positive degree days.'*

...so that it is now at the end of that paragraph, and modify it so that it reads:

*'In the contemporary period, we also see warmer seas, as well as a larger increase in positive degree days. There is considerable variability from year to year in the positive degree days during this period, which perhaps reflects the compensating short term warming and cooling events referred to by Hanna et al. (2021).'*

[lines 391-392] More discussion is needed to explain why the interpretation is that warming waters are responsible for glacier retreat, rather than rising air temperatures.

On reflection, we realise that this statement was somewhat presumptuous. We do not know that warming waters are responsible, but rather we hypothesise that warming waters may well be influential. This is because our data shows that waters have warmed, and so we feel that these must have some role, along the lines suggested by Wood et al. (2021). It is, however, correct, that we do not know this to be the case and so we rephrase the passage. It used to read:

*It is these warming waters that we believe are responsible for the retreat of many of the tidewater glaciers in our sample.*

But we now say:

*We hypothesise that the warming waters that we observe may well play an important role in the mass loss we observe.*

[line 400] Add the word "detail" following "more"

Correction made as suggested.

[lines 402-404] This sentence, which states that SMB is a driver of marine-terminating glacier change in recent years, seems like it contradicts the previous paragraph, which states that ocean temperature has been responsible for the retreat of these glaciers since the 1990s. I suggest combining the previous paragraph with this sentence and clarifying the

interpretation of whether one or both drivers are responsible for frontal changes during various periods.

The confusion here arises from the fact that our statement that SMB has become increasingly important relates to local glaciers and land-terminating glaciers, not marine terminating glaciers. With the modification made above in which we now 'hypothesise' that warming waters are important for marine terminating glaciers, we feel that this previous paragraph and the one under discussion are no longer confusing.

[line 405] Remove the hyphen between "local" and "heterogeneity"

Correction made as suggested.

[lines 430-438] This paragraph presents results rather than interpretation. I suggest moving this text from the discussion to the results section.

We agree that some of the text in this passage is quite descriptive, and thus perhaps more akin to a results section. However, we would very much like to keep this text here if the reviewer and editor approve. The reason for this is that throughout the results, we talk about the glaciers and their behaviour more generally, trying to identify shared characteristics. It is only here in the discussions that we introduce the idea of heterogeneity and variability between glaciers. As a result, it seems relevant to briefly describe the nature of the heterogeneity before attempting to explain this. If we were to move this passage to the results, we would need to introduce the idea of glacier-to-glacier heterogeneity before we had uncovered this in our data and interpretation of those data. We feel this would confuse our line of reasoning and make the text more complicated. Hence, we prefer to leave it in its current position but are happy to follow the recommendation if our rationale is not convincing.

[line 430] Please specify: "2-3 times more retreat" ... more than what?

We mean more than the list of glaciers that were discussed in the previous paragraph (i.e. the majority of those shown in Figures 10 and 11). We rephrase the text so that this is now clearer. We now say: 'In addition to these previously discussed outlets in which frontal change is minimal, there are three outlets that in particular show 2-3 times more retreat than these.'

[line 453] Should "down" be changed to "due"?

We feel that either is fine, but we have corrected to 'due'.

[lines 439-441] The first sentence needs to be rephrased because I think it incorrectly presents the conclusions of Wood et al. (2021). In fact, the second sentence of this

paragraph contradicts the first. I suggest replacing the first two sentences with the following: "Although the behavior of many of Greenland's marine-terminating glaciers has been speed up and mass loss as a consequence of warming ocean waters (Wood et al., 2021), there are glaciers that have exhibited small or no retreat."

We agree and appreciate the suggested alternative. We have thus made this change.

[lines 439-455] This paragraph hypothesizes the response of glaciers in terms of dynamic thinning and links that to glacier ice speed and calving. However, I'm not clearly seeing the link. For example, it is stated that the eastern portion of glacier 15 is sitting on a shallower bed and has slower ice speed and, therefore, the terminus retreat is due to calving and there is less dynamic thinning. Why would calving driven retreat and slower ice speed necessarily imply that there is relatively less dynamic thinning? This link needs to be explained in greater detail.

In response to earlier comments, this section has now changed and we no longer make reference to dynamic thinning. Our explanations and hypothesising here are now less forthright and more speculative.

[line 443] I believe that "Glacier 15" should be replaced with "Glacier 14" here

Thankyou for this comment, this has been changed.

### **Additional changes**

Towards the end of the first paragraph of section 4.2, we list a series of variables that control glacier behaviour. These are listed and labelled a, b, c etc., but previously we had multiple variables listed as 'c'. This has now been corrected so the list reads a, b, c, d, and e.
